# Supplementary material for: A high-throughput screening permeability separator with high catalytic conversion kinetics for Li–S batteries
Source: Royal Society of Chemistry journal article supplement (doi:10.1039/d2ta04592c), 2022-01-01
Supplement: d2ta04592c1.pdf [file d2ta04592c1.pdf]

**Supporting information for  
High-Throughput Screening Permeability Separator with High Catalytic  
Conversion Kinetics for Li-S Batteries**

Yuting Jiang <sup>a</sup>, Pei Liang <sup>b</sup>, Mingjian Tang <sup>c</sup>, Shipeng Sun <sup>c</sup>, Huihua Min <sup>d</sup>, Jiachen Han <sup>a</sup>, Xiaodong Shen <sup>a</sup>, Hao Yang <sup>\*a</sup>, Dongliang Chao <sup>e</sup>, Jin Wang <sup>\*a</sup>

<sup>a</sup> College of Materials Science and Engineering, Nanjing Tech University, Nanjing 211800, PR China

E-mail: msejwang@njtech.edu.cn (J. Wang); mse\_yanghao@njtech.edu.cn

<sup>b</sup> College of Optical and Electronic Technology, China Jiliang University, Hangzhou 310018, PR China

<sup>c</sup> State Key Laboratory of Materials-Oriented Chemical Engineering, Jiangsu National Synergetic Innovation Center for Advanced Materials, College of Chemical Engineering, Nanjing Tech University, Nanjing 211816, China

<sup>d</sup> Electron Microscope Lab, Nanjing Forestry University, Nanjing 210037, Jiangsu, PR China

<sup>e</sup> Laboratory of Advanced Materials, Shanghai Key Laboratory of Molecular Catalysis and Innovative Materials, State Key Laboratory of Molecular Engineering of Polymers, and School of Chemistry and Materials, Fudan University, Shanghai, 200433, China.

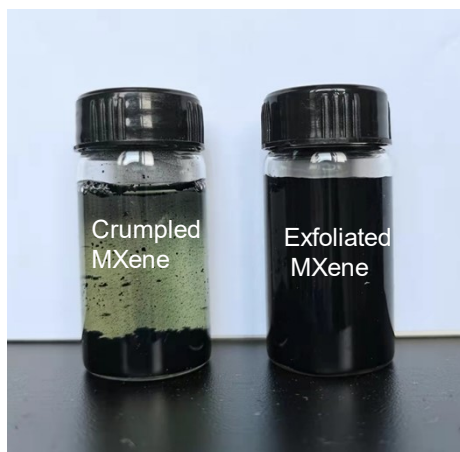

**Figure S1** The digital photo of exfoliated few-layered MXene solution and crumpled MXene flocculation.

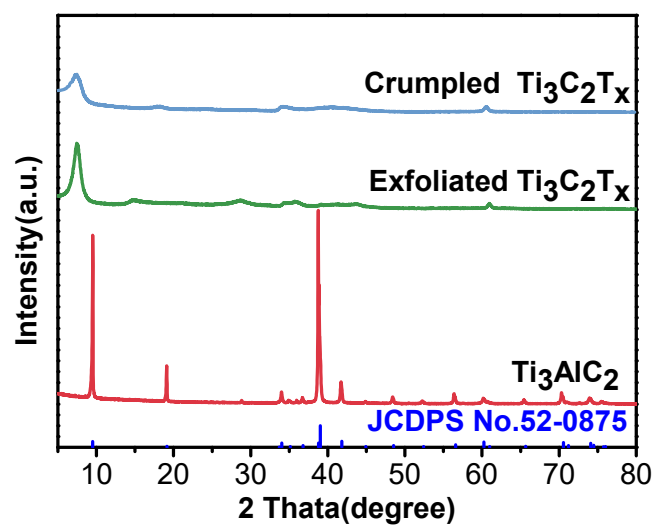

**Figure S2** XRD patterns of  $\text{Ti}_3\text{AlC}_2$ ,  $\text{Ti}_3\text{C}_2\text{T}_x$  and crumpled  $\text{Ti}_3\text{C}_2\text{T}_x$  nanosheets.

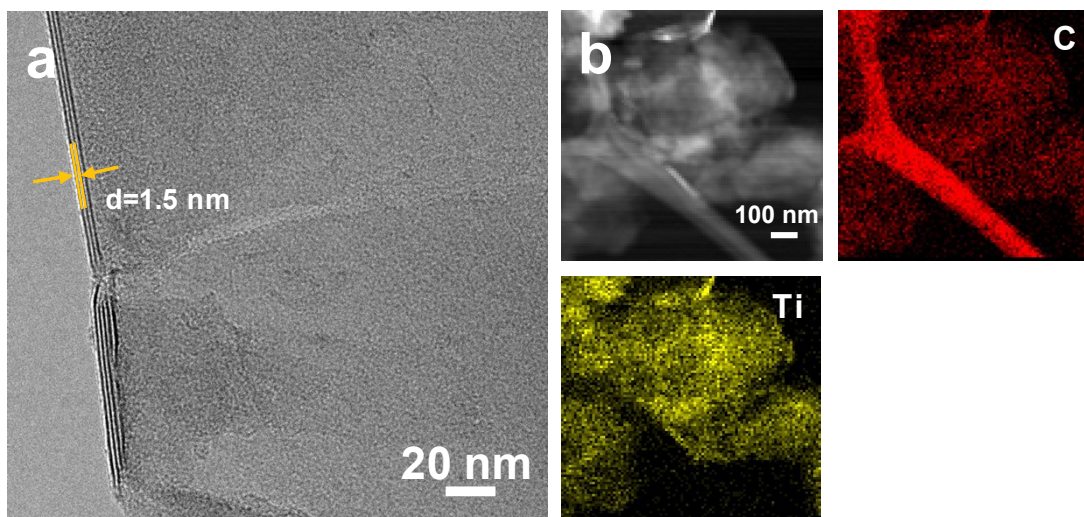

**Figure S3** (a) TEM image of delaminated MXene nanosheets showing an interlayer spacing of 1.5 nm. (b) HAADF-STEM image and the corresponding elemental mapping images of delaminated MXene.

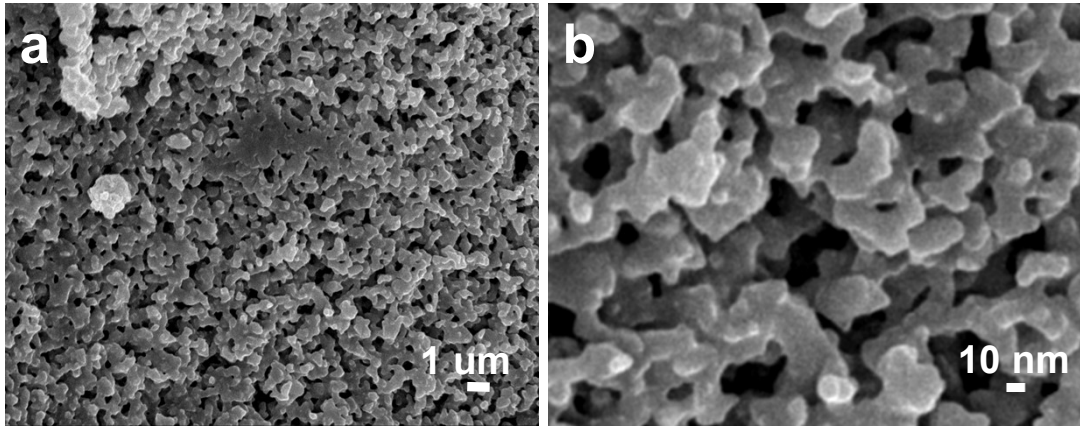

**Figure S4** SEM images of MoS<sub>2</sub> prepared without crumpled MXene.

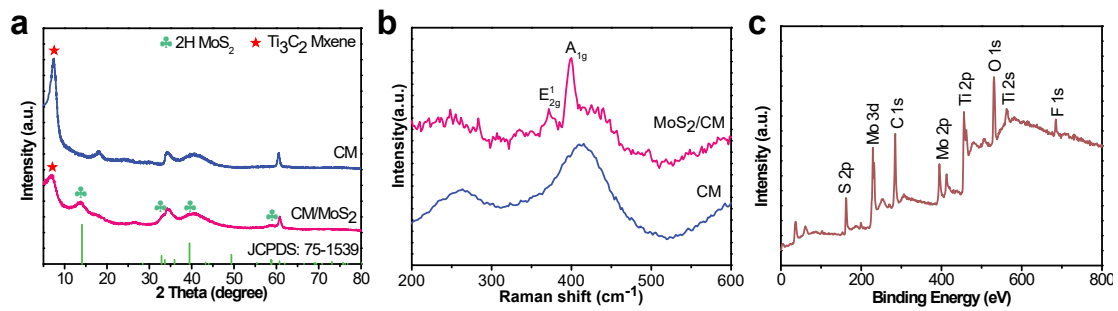

**Figure S5** (a) XRD patterns of CM and CM/MoS<sub>2</sub>. (b) Raman patterns of CM and CM/MoS<sub>2</sub>. (c) XPS survey spectra of CM/MoS<sub>2</sub>.

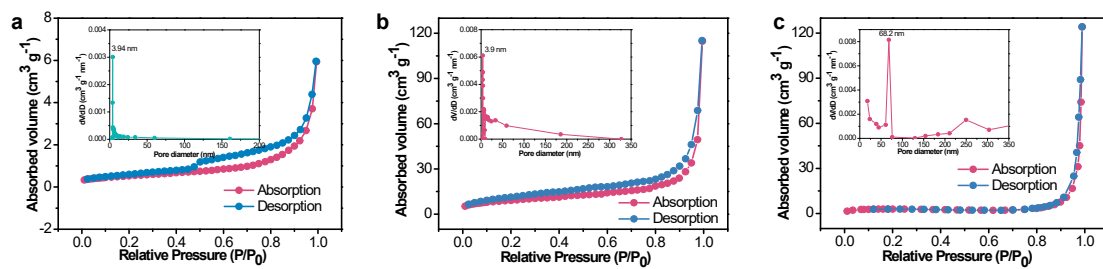

**Figure S6**  $N_2$  adsorption/desorption isotherms and the corresponding pore size distribution of (a) CM/MoS<sub>2</sub>, (b) MoS<sub>2</sub> and (c) CM.

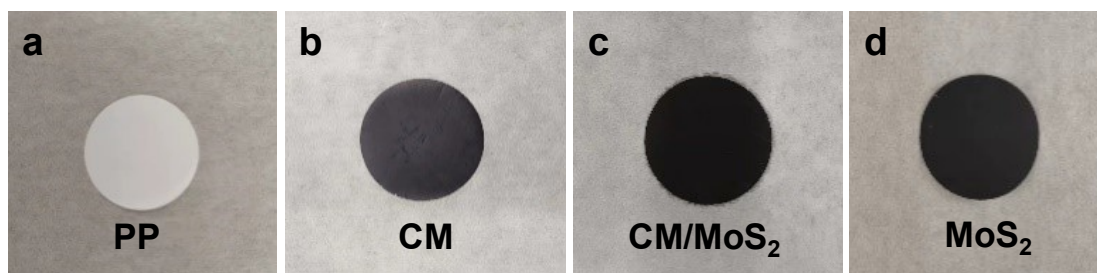

**Figure S7** The digital photographs of the fabricated functional separators displaying distinguishable color compared with the pristine PP separator.



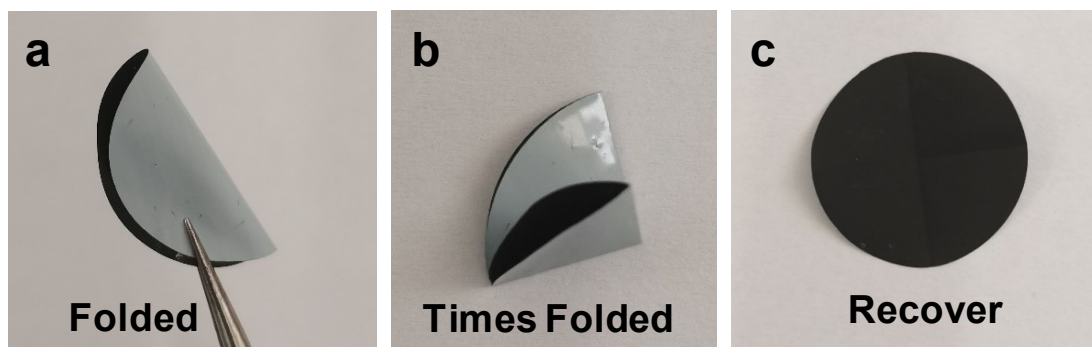

**Figure S8** The digital photo of (a) folded, (b) several times folded and (c) recovered CM/MoS<sub>2</sub> separators.

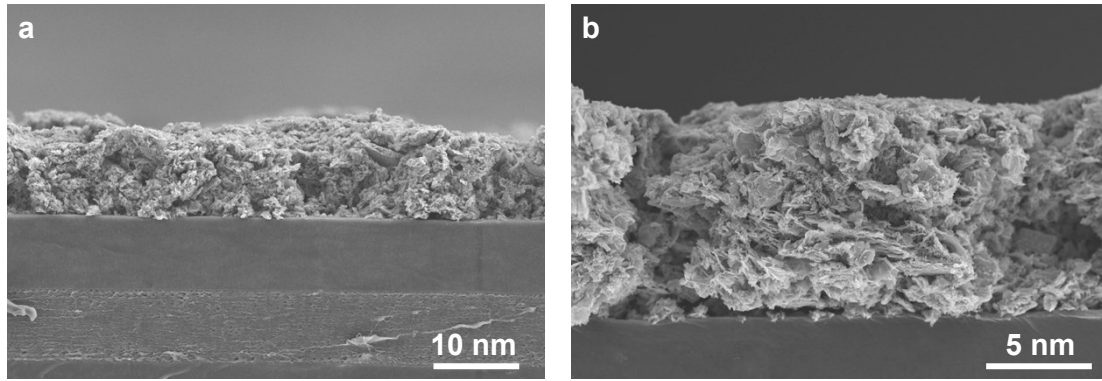

**Figure S9** Cross-section SEM images of CM/MoS<sub>2</sub>-modified PP separator.

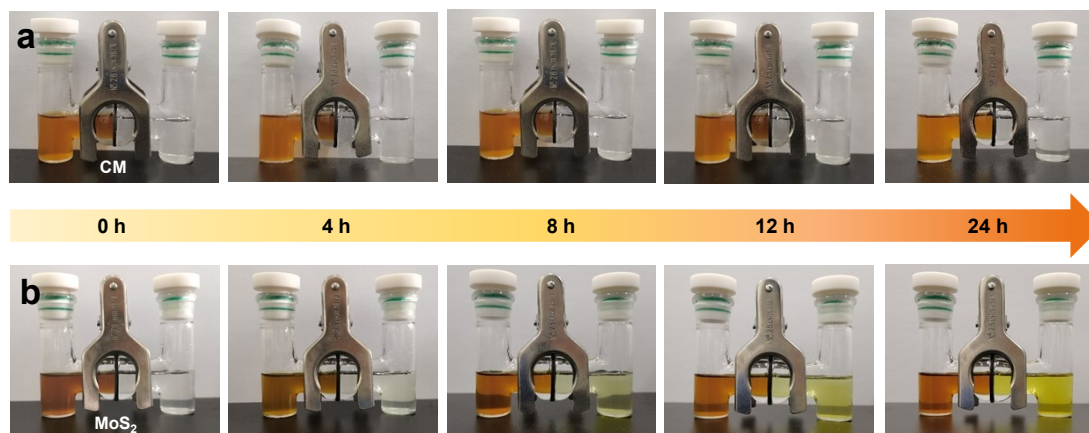

**Figure S10** Polysulfides permeation measurements with H-shaped glass cells using (a) CM-modified separator and (b) MoS<sub>2</sub>-modified separator.

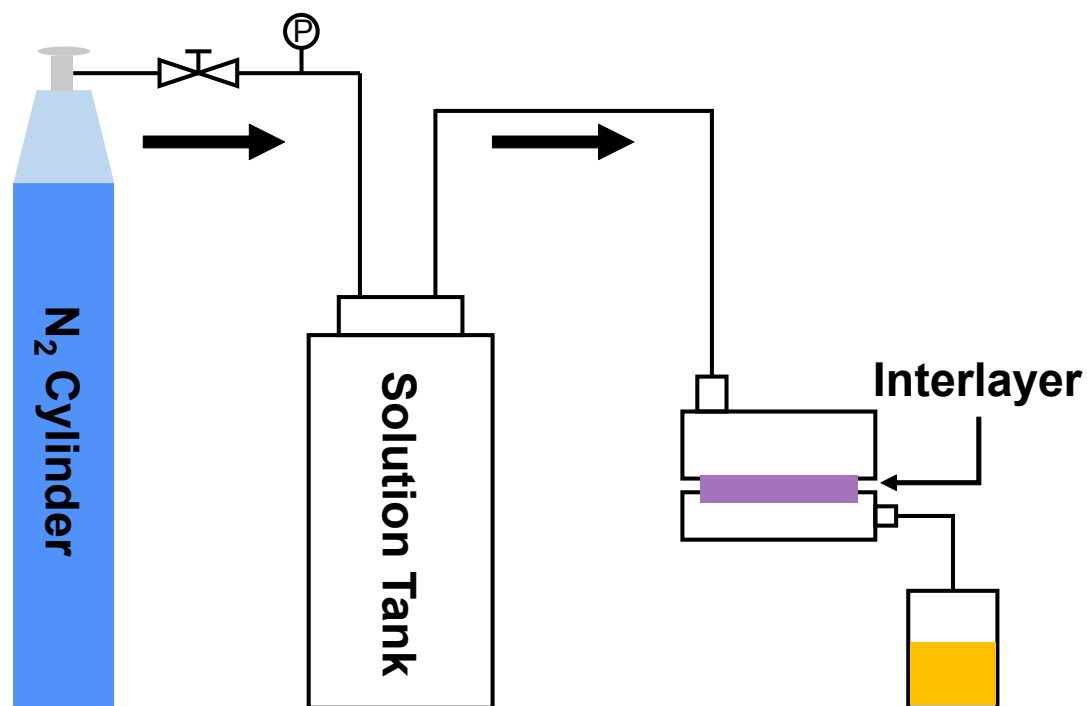

**Figure S11** The schematic dead-end filtration system for the measurement of electrolyte permeability in various separators.

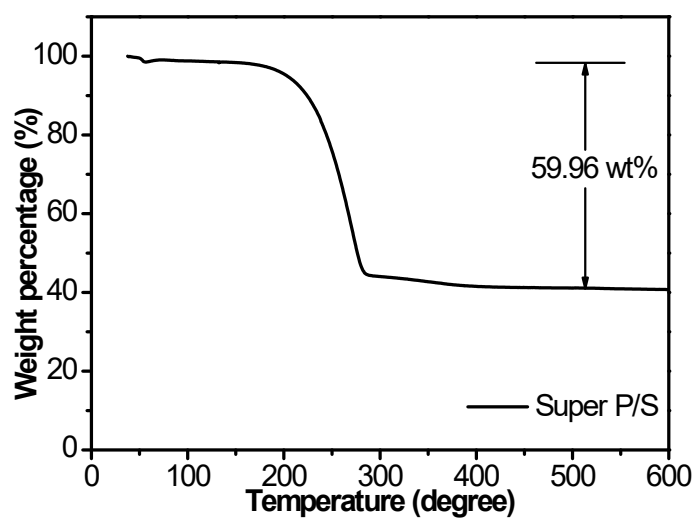

**Figure S12** TGA curve of a Super P Black/S cathode.

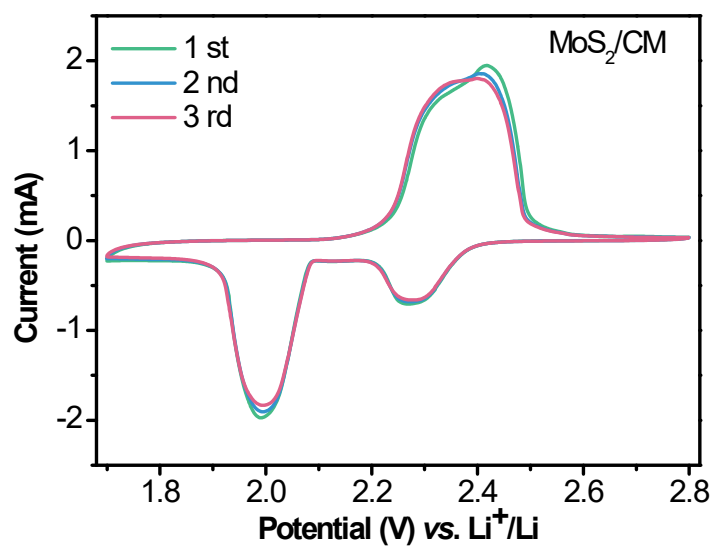

**Figure S13** Cyclic voltammetry curves of the Li-S battery with CM/MoS<sub>2</sub> separator in the first three cycles.

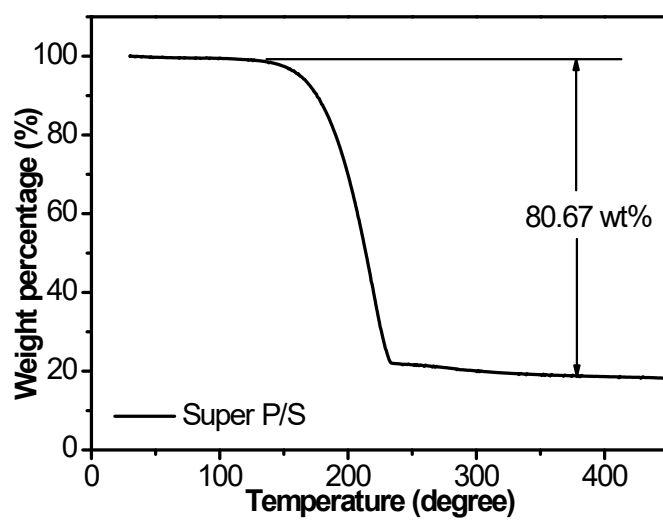

**Figure S14** TGA curve of a Super P/S cathode with a high sulfur loading of 5 mg  $\text{cm}^{-2}$  with a sulfur content of 80%.

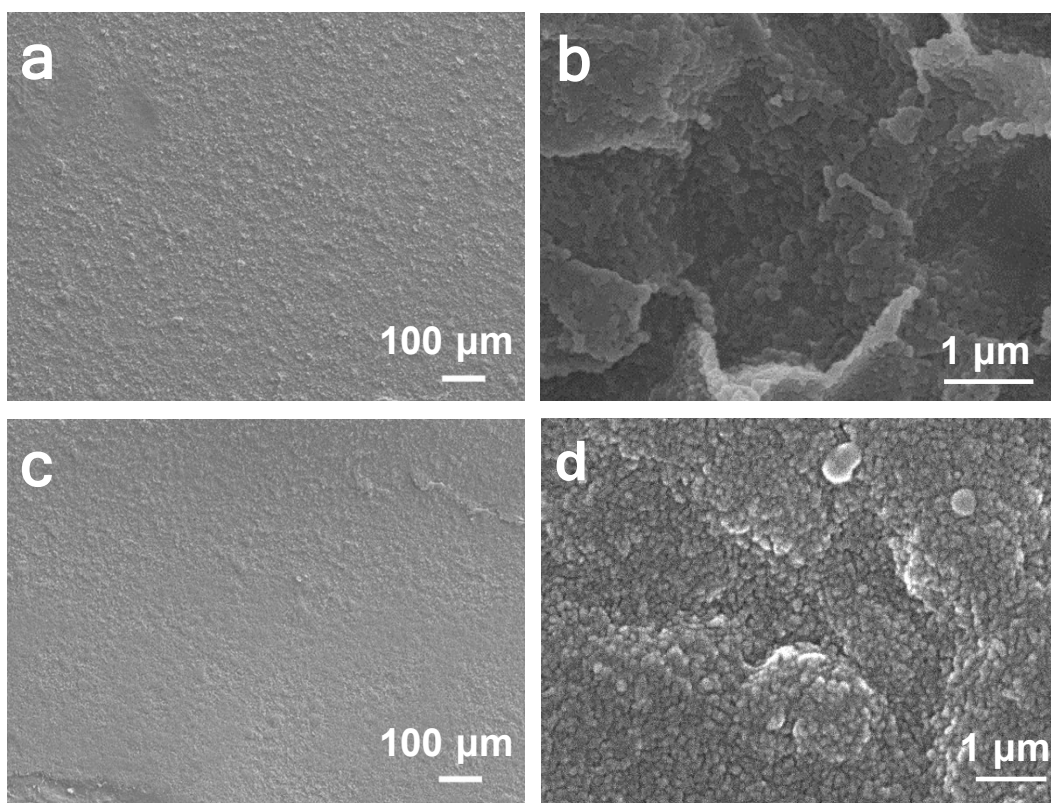

**Figure S15** SEM images of the CM/MoS<sub>2</sub> modified separator adjacent to the cathode side (a-b) before and (c-d) after 100 cycles.



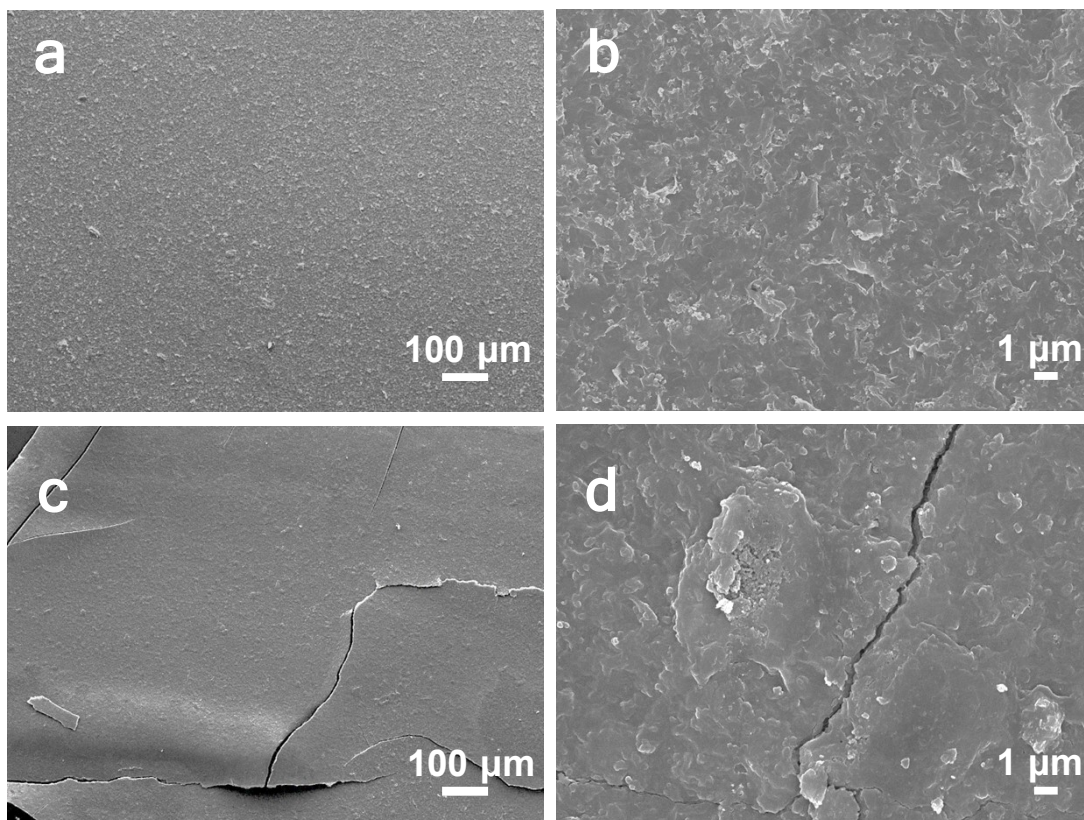

**Figure S16** SEM images of the CM modified separator adjacent to the cathode side (a-b) before and (c-d) after 100 cycles.

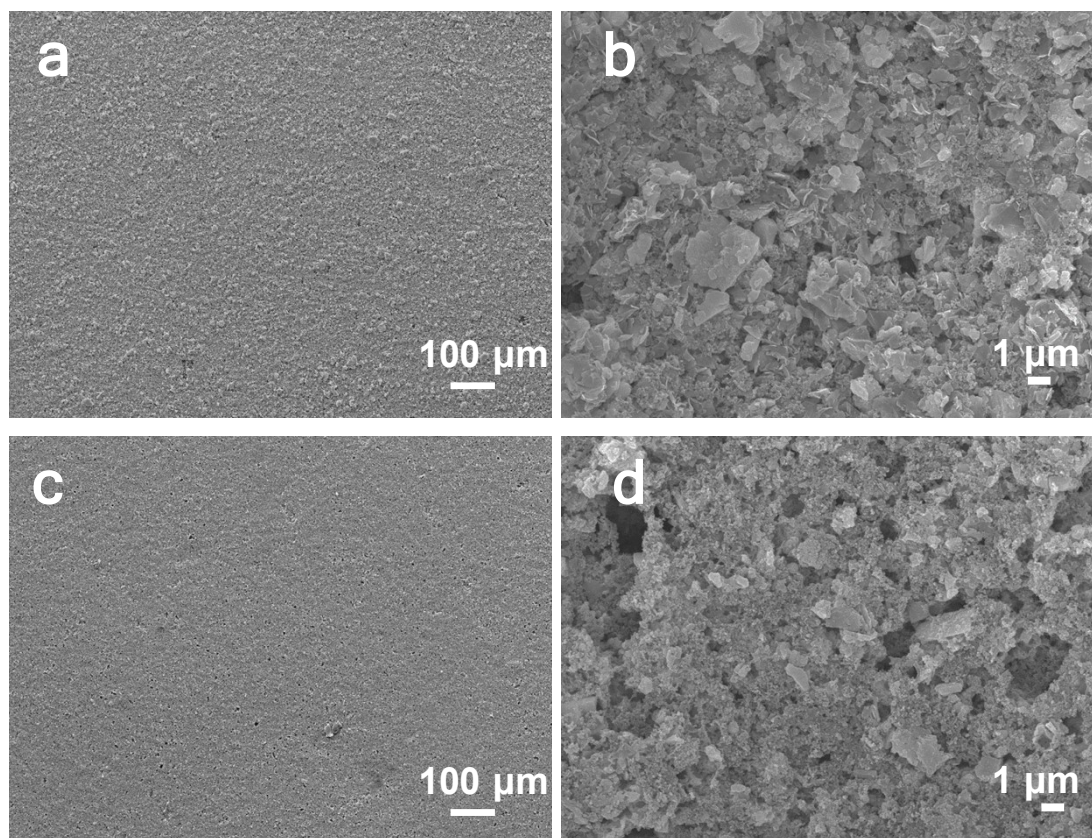

**Figure S17** SEM images of the MoS<sub>2</sub> modified separator adjacent to the cathode side (a-b) before and (c-d) after 100 cycles.

**Table S1** The measured parameters for the electrolyte permeability of various separators.

| <b>Sample</b>       | <b>Initial mass (g)</b> | <b>Terminal mass (g)</b> | <b>Time (min)</b> | <b>Pressure (bar)</b> | <b>Permeability (L m<sup>-2</sup> h<sup>-1</sup> bar<sup>-1</sup>)</b> |
|---------------------|-------------------------|--------------------------|-------------------|-----------------------|------------------------------------------------------------------------|
| PP separator        | 16.4567                 | 22.5213                  | 5                 | 7                     | 28.04                                                                  |
| CM                  | 16.5625                 | 16.8633                  | 5                 | 7                     | 1.39                                                                   |
| MoS <sub>2</sub>    | 16.6041                 | 20.7357                  | 5                 | 7                     | 19.11                                                                  |
| CM/MoS <sub>2</sub> | 16.5933                 | 20.6588                  | 5                 | 7                     | 18.80                                                                  |

**Table S2** The fitted resistance parameters of the coin cells with various modified separators.

| <b>Sample</b>       | <b>R1</b> | <b>R2</b> | <b>R3</b> |
|---------------------|-----------|-----------|-----------|
| CM/MoS <sub>2</sub> | 1.665     | 9.058     | 7.272     |
| MoS <sub>2</sub>    | 2.304     | 14.01     | 5.9       |
| CM                  | 1.606     | 22.4      | 6.694     |
| PP separator        | 1.339     | 20.53     | 3.36      |

**Table S3** Comparison of various performance parameters with the reported MoS<sub>2</sub> and MXene-based modified interlayers.

| Samples                                                        | Sulfur loading (mg cm <sup>-2</sup> ) | Specific capacities at various C-rates (mAh g <sup>-1</sup> ) |      |       |      |     |     | Capacity retention (%) | Cycling number |
|----------------------------------------------------------------|---------------------------------------|---------------------------------------------------------------|------|-------|------|-----|-----|------------------------|----------------|
|                                                                |                                       | C-rates (mAh g <sup>-1</sup> )                                |      |       |      |     |     |                        |                |
|                                                                |                                       | 0.1 C                                                         | 0.2C | 0.5 C | 1C   | 2C  | 3C  |                        |                |
| Our Work                                                       | 2                                     | 1336                                                          | 1178 | 1001  | 896  | 810 | 652 | 73                     | 500            |
| MoS <sub>2</sub> /graphene <sup>6</sup>                        | 1                                     | /                                                             | /    | 1245  | 1082 | /   | 949 | 71                     | 500            |
| MXene nonosheets <sup>7</sup>                                  | 1.7                                   | /                                                             | 1062 | 756   | 634  | 517 | /   | 71.48                  | 400            |
| Ti <sub>3</sub> C <sub>2</sub> nanoribbon <sup>8</sup>         | 0.7-1                                 | /                                                             | 1062 | 744   | 691  | 513 | /   | 50.4                   | 200            |
| MoS <sub>2</sub> /TiN <sup>9</sup>                             | 2.5                                   | /                                                             | 1480 | 1242  | 1010 | 841 | 697 | 50                     | 500            |
| Co <sub>9</sub> S <sub>8</sub> @MoS <sub>2</sub> <sup>10</sup> | 3                                     | 1221                                                          | 1065 | 978   | 806  | 601 | /   | 63.5                   | 500            |
| MoS <sub>2</sub> <sup>11</sup>                                 |                                       | 1471                                                          | 1039 | 770   | 550  | /   | /   | 49.6                   | 600            |
| Porous MXene <sup>12</sup>                                     | 0.91                                  | 1282                                                          | 1004 | 861   | 740  | 677 | /   | 72.4                   | 500            |

## References:

1. M.L. Liu, L. Li, M.J. Tang, L. Hong, S.P. Sun and W. Xing, *Chemical Engineering Science*, 2021, **245**, 116854.
2. M.L. Liu, L. Li, Y.X. Sun, Z.J. Fu, X.L. Cao and S.P. Sun, *Journal of Membrane Science*, 2021, **617**, 118644.
3. T.D. Lu, L.L. Zhao, W. F. Yong, Q. Wang, L. Duan and S.P. Sun, *Chemical Engineering Journal*, 2021, **409**, 128206.
4. G. G. Kresse and J. J. Furthmüller, *Physical review. B, Condensed matter*, 1996, **54**, 11169.
5. P. J. P. R. B. Chl, 1994, **50**, 17953-17979.
6. Z. Cheng, Y. Chen, Y. Yang, L. Zhang, H. Pan, X. Fan, S. Xiang and Z. Zhang, *Advanced Energy Materials*, 2021, **11**, 2003718.
7. S. Zhang, N. Zhong, X. Zhou, M. Zhang, X. Huang, X. Yang, R. Meng and X. Liang, *Nano-Micro Letters*, 2020, **12**, 112.
8. Y. Dong, S. Zheng, J. Qin, X. Zhao, H. Shi, X. Wang, J. Chen and Z.-S. Wu, *ACS Nano*, 2018, **12**, 2381-2388.
9. M. Waqas, Y. Han, D. Chen, S. Ali, C. Zhen, C. Feng, B. Yuan, J. Han and W. He, *Energy Storage Materials*, 2020, **27**, 333-341.
10. B. Li, Q. Su, L. Yu, J. Zhang, G. Du, D. Wang, D. Han, M. Zhang, S. Ding and B. Xu, *ACS Nano*, 2020, **14**, 17285-17294.
11. Z. A. Ghazi, X. He, A. M. Khattak, N. A. Khan, B. Liang, A. Iqbal, J. Wang, H. Sin, L. Li and Z. Tang, *Advanced Materials*, 2017, **29**.
12. D. Xiong, S. Huang, D. Fang, D. Yan, G. Li, Y. Yan, S. Chen, Y. Liu, X. Li, Y. Von Lim, Y. Wang, B. Tian, Y. Shi and H. Y. Yang, *Small*, 2021, **17**, 2007442.
